# Supplementary material
Source: publisher figshare collection journal article supplement (https://aacr.figshare.com/articles/dataset/_/22430112)

Supplementary Figure S4.

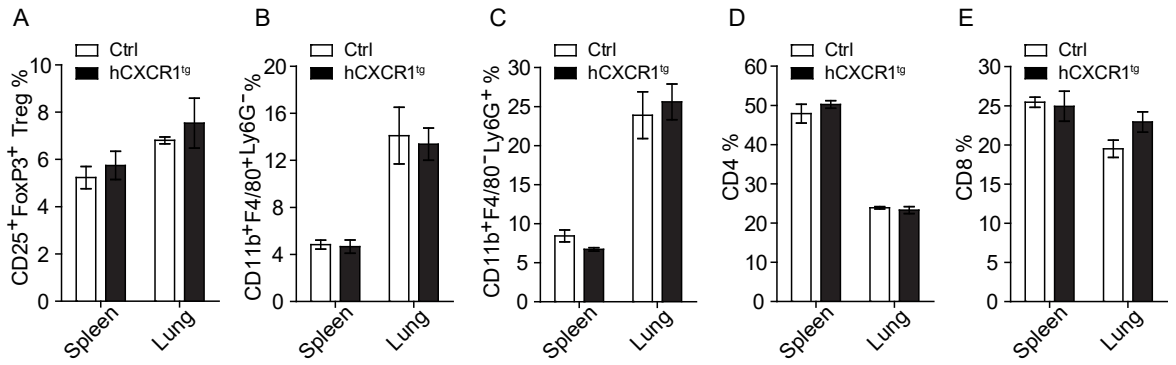

Supplement: Supplementary file 1 [file 39876447]
